1

2 **Multisensory stimuli improve relative localisation judgments compared to unisensory**

3 **auditory or visual stimuli**

4

5 Laura Freeman<sup>1\*</sup>, Katherine C Wood<sup>1\*</sup> and Jennifer K Bizley<sup>1</sup>

6

7 \* equal contribution

8 <sup>1</sup> Ear Institute, University College London

9

10 332 Gray's Inn Road,

11 London

12 WC1X 8EE

13

14 Corresponding author: Jennifer Bizley [j.bizley@ucl.ac.uk](mailto:j.bizley@ucl.ac.uk)

15

16 [Running title: auditory and visual relative localisation](#)

17 **ABSTRACT**

18 Observers performed a relative localisation task in which they reported whether the second  
19 of two sequentially presented signals occurred to the left or right of the first. Stimuli were  
20 detectability-matched auditory, visual, or auditory-visual signals and the goal was to  
21 compare changes in performance with eccentricity across modalities. Visual performance  
22 was superior to auditory at the midline, but inferior in the periphery, while auditory-visual  
23 performance exceeded both at all locations. No such advantage was seen when  
24 performance for auditory-only trials was contrasted with trials in which the first stimulus  
25 was auditory-visual and the second auditory only.

26

27

28

29 Keywords:

30 Sound localisation, spatial capture,

## 31 INTRODUCTION

32 Both auditory (Mills, 1958; Makous and Middlebrooks, 1990; Charbonneau et al., 2013;  
33 Wood and Bizley, 2015; Carlile et al., 2016) and visual localisation acuity declines with  
34 eccentricity (Mateeff and Gourevich, 1984; Perrott et al., 1993; Charbonneau et al., 2013;  
35 Carlile et al., 2016). Few previous studies have attempted to directly compare spatial acuity  
36 for auditory and visual stimuli throughout the visual field and focus instead on the spatial  
37 capture observed when spatially separated auditory-visual signals are presented (Howard and  
38 Templeton, 1966; Bertelson and Radeau, 1981). Two exceptions to this are Perrott et al.,  
39 (1993) and Charbonneau et al (2013). Both determined that both visual and auditory  
40 localisation judgments declined as stimuli move from central to peripheral space. However,  
41 the studies produced conflicting results, and neither study perceptually matched stimuli  
42 across modalities. Perrott et al., did not test bimodal stimuli, and reported equivalent auditory  
43 and visual performance, while Charbonneau reported superior visual performance and no  
44 advantage for auditory-visual stimuli but on every trial an auditory-visual reference was  
45 provided and only the target varied in modality.

46  
47 The aims of this study was to determine (i) how relative localisation judgments vary  
48 throughout frontal space for *equally-detectable* auditory and visual signals and (ii) whether an  
49 auditory-visual signal conferred a processing advantage over the most effective unisensory  
50 stimulus. Finally, because we observed a clear multisensory benefit, we also included stimuli  
51 in which an auditory-visual reference was followed by an auditory only target. It was  
52 hypothesised that localisation acuity would decline with eccentricity for both auditory and  
53 visual signals but that at central locations (i.e. the fovea) vision should provide the most  
54 accurate estimate of source location, whereas at more peripheral locations sound localisation  
55 would be more accurate than visual localisation.

## 56 METHODS

### 57 A Participants

58 This experiment received ethical approval from the UCL Research Ethics Committee  
59 (3865/001). 14 normal hearing adults between the ages of 18 and 35 participated in  
60 Experiment 1. Two participants were excluded due to poor performance (average  $d'$  <0.5). 9  
61 of the remaining 12 participants participated in Experiment 2. All participants had no  
62 reported hearing problems or neurological disorders.

### 63 B Testing chamber

64 For testing, participants sat in the middle of an anechoic chamber surrounded by a ring  
65 speakers arranged at  $15^\circ$  intervals from  $-67.5^\circ$  to  $+67.5^\circ$  (Figure 1A). Each speaker had a  
66 light emitting diode (LED) mounted immediately below it. The participants' heads were kept  
67 in a stationary position and supported there by a chin rest. Participants were asked to  
68 maintain fixation on a fixation cross located on the speaker ring at  $0^\circ$  azimuth and their head  
69 and eye position were remotely monitored with an infra-red camera.

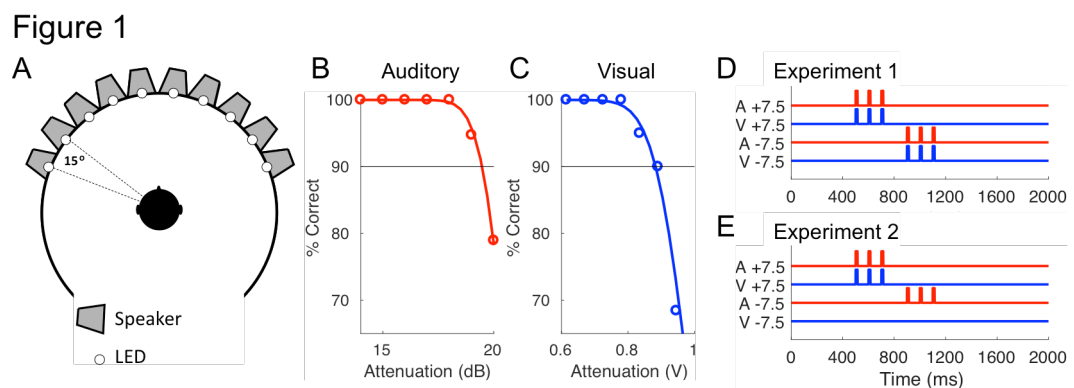

70

### 71 *Figure 1 (color online)*

72 *A Schematic of the testing chamber B, C Example threshold function for auditory (B) and*  
73 *visual (C) detection abilities. D, E, schematic of the trial structure for Experiment 1 (D, AV*  
74 *trial) and Experiment 2 (E, AV reference trial) showing for one example trial in which the*  
75 *relative location of the stimulus shifts leftwards from  $+7.5$  degrees to  $-7.5$  degrees.*

## 76 **C Stimuli**

77 All stimuli were generated in MATLAB and presented using the PsychToolBox extension  
78 (Brainard, 1997) at a sampling frequency of 48 kHz. Participants reported the location of a  
79 target stimulus (left or right) relative to a preceding reference stimulus. In the Auditory (A)  
80 condition 3 pulses of white noise were presented from a reference speaker, followed by 3  
81 pulses of white noise from a target speaker. In the Visual (V) condition three pulses of light  
82 were emitted from a reference LED mounted on a speaker, followed by three pulses of light  
83 from a target location. In the Auditory-Visual (AV) condition in Experiment 1 spatially and  
84 temporally coincident light and sound pulses were presented. In Experiment 2 spatially and  
85 temporally coincident sound and lights were presented at the reference location, and only the  
86 auditory stimulus was presented at the target location. Auditory stimuli were broadband  
87 noise bursts (as in Wood and Bizley, 2015). Reference and target speakers were always  
88 separated by 15° (Fig. 1A). Stimulus pulses were 15 ms in duration, cosine ramped with 5ms  
89 duration at the onset and offset of each pulse. Pulses were presented at a rate of 10 Hz with a  
90 185 ms delay between the end of the final pulse at the reference speaker and the first pulse at  
91 the target speaker in order to aid perceptual segregation of the reference and the target. The  
92 pulses were embedded in a noisy background generated by presenting independently  
93 generated auditory and visual noise from each speaker/LED. The amplitude was varied every  
94 15 ms with amplitude values drawn from a distribution whose mean and variance could be  
95 controlled (see Wood and Bizley, 2015). In these experiments the mean noise level across all  
96 speakers was 63 dB SPL (calibrated using a CEL-450 sound level meter) and the signal  
97 attenuation was set for each participant by performing a threshold measurement. At the start  
98 of each trial the noisy background was ramped on with a linear ramp over 1 second and  
99 ramped down over 1 second at the end of the trial. The stimulus pulses, which constituted the  
100 reference and target, were presented between 50 and 1000 ms after the noise reached its full

101 level. Stimuli were presented by Canton Plus XS.2 speakers (Computers Unlimited, London)  
102 and white LEDs via a MOTU 24 I/O analogue device (MOTU, MA, USA). For auditory  
103 stimuli the MOTU output was amplified via 2 Knoll MA1250 amplifiers (Knoll Systems,  
104 WA, USA). Testing runs were divided into blocks of trials lasting approximately 5 minutes.  
105 At the end of each block the participant could take a break and choose when to initiate the  
106 next block. Participants performed 15 trials for each reference location / direction /modality  
107 combination.

#### 108 **D Threshold**

109 In order to perform the auditory and visual task at equivalent levels of difficulty an initial  
110 *threshold* test was performed. In this task participants were oriented to face a speaker at the  
111 frontal midline ( $0^\circ$  azimuth). The reference stimulus was always presented from this  
112 speaker/LED, and the target was presented from a speaker/LED at either  $-60^\circ$  or  $+60^\circ$ .  
113 Auditory and visual stimuli were presented in separate testing blocks. Participants reported  
114 the direction in which the stimulus moved using the left and right arrows on a keyboard to  
115 indicate  $-60^\circ$  and  $+60^\circ$ , respectively. Auditory stimuli were presented at 10 different SNRs  
116 by varying the signal attenuation in 1 dB steps over a 10 dB range, and visual stimuli were  
117 presented at 7-10 SNRs by varying voltage values driving the LEDs. Percentage correct  
118 lateralisation scores were fit using binomial logistic regression and the threshold value (90%  
119 correct) was extracted from the fitted function. The aim was to present stimuli at a level that  
120 was clearly audible/visible, but difficult enough to be challenging for the subsequent relative  
121 localisation task. The threshold therefore served both to match difficulty across participants  
122 (as in Wood and Bizley, 2015) and sensory modalities.

#### 123 **H Analysis**

124 Overall performance was assessed using signal detection theory to calculate sensitivity index  
125 ( $d'$ ) statistics for participants' ability to discriminate whether a target sound moved left or

126 right (Green and Swets, 1966). Performance was estimated across reference-target pairs of  
127 the same locations (so that the change in localisation cues for left moving and right moving  
128 trials were equivalent) and considered relative to the mean location of that speaker pair.  
129 Multisensory gain was calculated as the improvement in performance in the multisensory  
130 condition relative to the best unisensory condition (in Experiment 1) or the unisensory  
131 auditory stimulus (in Experiment 2). Since performance varied with azimuthal position,  
132 values were expressed as a % relative to the best unisensory performance for that eccentricity  
133 (Charbonneau et al., 2013). Reaction times were compared to predictions of the race model  
134 (Miller, 1982) using methods provided by Ulrich et al., (2007). Group level statistical  
135 analysis was performed in SPSS (v24, IBM) using repeated measures analysis of variance  
136 (ANOVA). Two-way repeated measures ANOVA were performed to determine the impact of  
137 modality and spatial location on sensitivity, bias and reaction time measures. One-way  
138 repeated measures ANOVA was used to determine the impact of eccentricity on multisensory  
139 gain or location within a modality.

## 140 RESULTS

141 Before participating in Experiment 1 listeners performed two short detection-in-noise  
142 threshold tests. These served to match the detectability of signals across modalities by  
143 assessing performance in a reduced version of the task across a range of signal attenuations  
144 (Fig 1B,C). This step is critical as it allows us to test each modality at an equivalently  
145 difficult level so that we can directly compare localisation ability across auditory and visual  
146 signals, it further serves to match difficulty across participants.

### 147 Experiment 1

148 Experiment 1 tested the ability of listeners to perform relative localisation judgments with  
149 auditory (A), visual (V) or spatially and temporally coincident auditory visual (AV) signals,

150 presented at their pre-determined signal attenuations. Performance varied throughout  
151 azimuthal space (Fig. 2A) with the best performance being obtained for stimuli close to the  
152 midline, and performance dropping off at more lateral locations. V performance, although  
153 superior to A at the midline, dropped with eccentricity more dramatically such that A  
154 performance was superior in the periphery. AV performance exceeded A and V at all  
155 locations except for stimuli crossing the midline, where performance was close to ceiling for  
156 both V and AV stimuli. Both stimulus modality ( $F_{(2,22)} = 20.8$ ,  $p=0.0006$ ) and location ( $F_{(8,88)}$   
157  $= 24.9$ ,  $p=1.25e-19$ ) influenced  $d'$ , with a significant modality x location interaction ( $F_{(16,176)} =$   
158  $20.8$ ,  $p=1.0934e-9$ ). Pairwise post-hoc comparisons revealed that AV performance was  
159 significantly different from both A and V (which were statistically indistinguishable) and that  
160 central reference locations were significantly different from peripheral ones (Table 1).  
161 Multisensory gain was calculated by comparing  $d'$  values obtained in the AV condition with  
162 those in the best unisensory condition, with data folded across space to determine how  
163 eccentricity impacted multisensory gain (Fig 2D). T-tests (Bonferoni corrected for 5  
164 locations) indicated that multisensory gains were non-zero at 15°, 30° and 60° ( $p<0.01$ ) and  
165 gain did not vary significantly with eccentricity (effect of eccentricity on multisensory gain:  
166  $F_{(4,44)}=1.82$ ,  $p=0.142$ ).

Figure 2

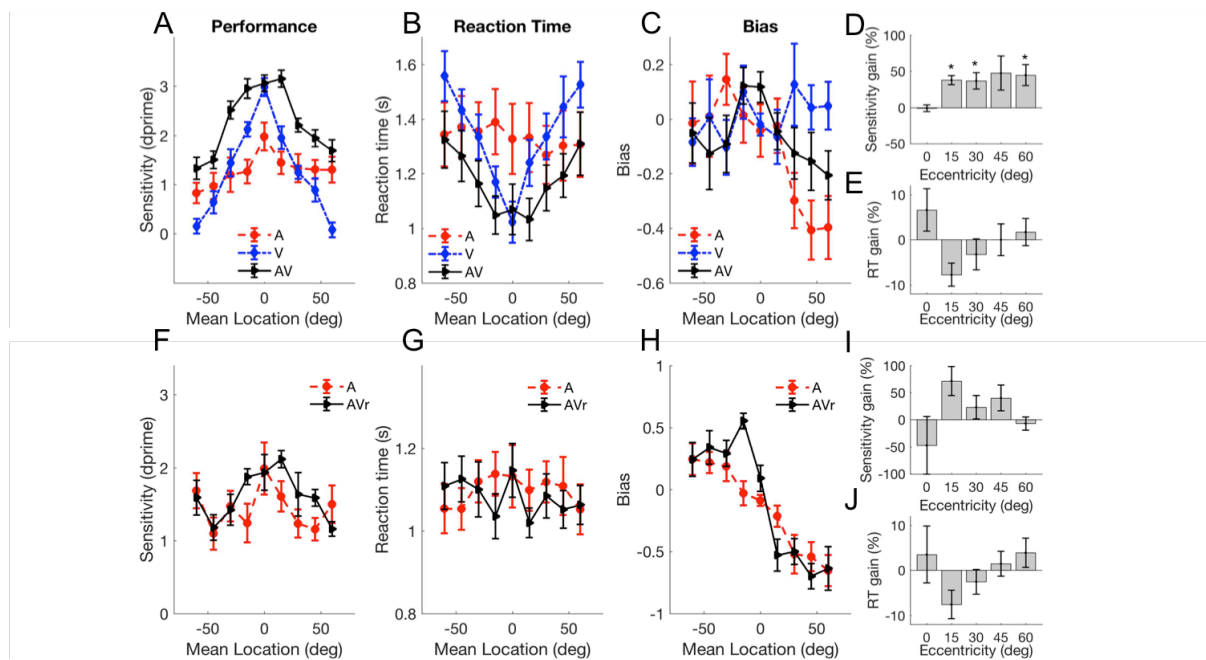

167

168 **Figure 2 (color online)**

169 *Mean ( $\pm$ SEM) (A)  $d'$  scores for A, V and AV trials as a function of the mean reference-target*  
 170 *location, (B) reaction times, (C) bias, (D) sensitivity gain (% gain relative to best unisensory*  
 171 *performance), E, reaction time gain (% relative to fastest unisensory). \* indicate values are*  
 172 *significantly non-zero ( $p < 0.05$  corrected for 5 comparisons). F-J, as A-E, but for Experiment*  
 173 *2.*

174

175 Reaction time measures (Fig. 2B) for relative localisation judgments with A and V stimuli  
 176 showed distinct patterns: V reaction times rose monotonically with increasing eccentricity  
 177 (one way ANOVA of location on V reaction times  $F_{(8,88)} = 16.1$   $p < 0.001$ ), while A reaction  
 178 times were consistent across space ( $F_{(8,88)} = 0.85$   $p = 0.57$ ). AV reaction times showed an  
 179 intermediary pattern of variability increasing more gradually with eccentricity (AV:  $F_{(8,88)}$   
 180  $= 6.94$   $p < 0.001$ ) and, with the exception of the central location, always being faster than  
 181 either modality alone. A two-way ANOVA investigating the influence of position and  
 182 modality on reaction time revealed effects of both location ( $F_{(8,88)} = 10.34$   $p = 4.3405e-10$ ) and



183 modality ( $F_{(2,22)} = 4.46, p=0.024$ ) with a significant modality x location interaction  
184 ( $F_{(16,176)}=5.73, p= 6.7686e-10$ ). Post-hoc analysis revealed that AV reaction times were  
185 significantly faster than both auditory and visual reaction times. While AV reaction times  
186 were significantly faster than either modality alone, they did not violate the race-model  
187 (Miller, 1982;),  $p>0.05$  at all locations) and when reaction times were expressed as  
188 multisensory gain (Fig. 2D,E), no location had a significantly non-zero gain (t-test against  
189 zero, Bonferoni corrected  $p<0.01$ ).

190

191 Bias measures were calculated for performance in each modality (Fig.2C). For both V and  
192 AV trials performance was constant across space (one way repeated measures ANOVA, AV:  
193  $F_{(8,88)} = 1.27, p = 0.270$  V:  $F_{(8,88)} = 0.64, p = 0.742$ ) whereas for A bias was influenced by  
194 spatial position ( $F_{(8,88)} = 2.92, p = 0.006$ ). Consistent with this, a two-way repeated measures  
195 ANOVA directly comparing these values revealed no effect of either modality ( $F_{(2,22)} = 2.76,$   
196  $p = 0.085$ ) or spatial position ( $F_{(8,88)} = 1.279, p = 0.269$ ), but a significant modality x position  
197 interaction ( $F_{(16,176)} = 2.23, p=0.006$ ; Fig.2C). In summary, AV stimuli conveyed an advantage  
198 in both performance and reaction time compared with the best unisensory stimulus,  
199 throughout frontal space.

## 200 Experiment 2

201 Experiment 2 aimed to determine whether the improvement in relative localisation ability for  
202 auditory-visual stimuli could be observed by presenting an AV reference stimulus and an  
203 auditory-only target. Nine of the 12 participants from Experiment 1 performed Experiment 2  
204 which included trials which were A-only for both reference and target, and AV reference, A-  
205 target trials. An AV reference provided no advantage over an A reference when the target  
206 was A alone (Fig 1E): Performance varied weakly with reference location ( $F_{(8,64)} = 2.391, p =$   
207  $0.025$ , post-hoc pairwise comparisons all  $p>0.05$ ), but not modality ( $F_{(1,8)} = 2.56, p = 0.148$ ),

208 nor was there a significant modality x location interaction ( $F_{(8,64)} = 1.788$ ,  $p = 0.096$ , Fig. 2F).  
209 Reaction times were also uninfluenced by an AV reference stimulus (spatial position;  $F_{(8,64)} =$   
210  $1.06$ ,  $p = 0.5$ , modality;  $F_{(1,8)} = 1.179$ ,  $p = 0.309$ , Fig. 2G). Consistent with an AV reference  
211 offering no perceptual advantage, measures of multisensory gain were not significantly  
212 different from zero (t-test, all  $p > 0.05$ , corrected for 5 comparisons, Fig. 2I,J). Finally we  
213 considered bias: consistent with auditory performance in Experiment 1, both auditory and AV  
214 reference conditions showed very similar patterns of bias, with listeners tending to show  
215 positive biases in left space, and negative biases in right space indicating a preference to  
216 respond towards the midline (spatial position;  $F_{(8,64)} = 16.46$ ,  $p = 0.000$ , modality;  $F_{(1,8)} =$   
217  $1.179$ ,  $p = 0.309$ , modality x position interaction  $F_{(8,64)} = 3.43$   $p = 0.002$ ; Fig. 2H). Thus the  
218 multisensory enhancement seen in Experiment 1 required that both stimulus intervals  
219 contained a multisensory stimulus.

## 220 DISCUSSION

221 In these experiments we tested the accuracy with which observers could discriminate  $15^\circ$   
222 shifts in location between sequentially presented reference and target stimuli. Difficulty  
223 matched auditory and visual stimuli were used so that performance could be directly  
224 compared across modalities. Visual accuracy was highest for central locations and fell off  
225 sharply at more peripheral locations. Auditory accuracy was highest at the midline, and also  
226 declined at more peripheral locations. However, the change in auditory relative localisation  
227 ability with eccentricity was much smaller in magnitude ( $\Delta d'$  change of 1.2 for A, compared  
228 to  $\Delta d' = 2.9$  for V) than for visual ability. Performance for auditory-visual stimuli also  
229 varied throughout space and, except at the midline where performance matched V (and  
230 performance was at or close to ceiling), was better than either A or V at all locations. AV  
231 stimuli were processed faster than A or V. Consistent with previous studies V reaction times

232 increased with eccentricity, and AV reaction times mirrored these, whereas processing time  
233 was not contingent on eccentricity for A-only stimuli.

234

235 These results emphasise that the advantage conferred by visual stimuli exists only in central  
236 regions closest to the fovea; at more lateral locations auditory stimuli are more accurately  
237 localised but that integrating stimuli offers an advantage throughout space. These findings  
238 mirror those of Perrott et al., (1993); although they demonstrated no statistical difference  
239 between auditory and visual stimuli, the group data for their 4 observers suggest that visual  
240 acuity exceeded that of auditory acuity at 0° (minimum visual angle, MVA = 0.5°, minimum  
241 auditory angle, MAA = 1°), was equivalent (roughly 2°) at 20°, and auditory acuity exceeded  
242 visual acuity at more lateral locations (for example at 80 degrees reference MAA = 4°, MVA  
243 = 7°). Charbonneau et al., (2013) performed a similar experiment to the present study, except  
244 that they only varied the modality of the target stimulus: a spatially congruent AV reference  
245 was presented on every trial. They reported that AV performance matched that of V, and  
246 exceeded A, at all locations. The difference in the results presented here and those in  
247 Charbonneau et al., (2013) is likely explained by our presenting matched-detectability stimuli  
248 across modalities which provided the opportunity to make direct comparisons in spatial  
249 acuity.

250

251 Where and how multisensory signals are integrated for decision-making is likely to be task  
252 and stimulus dependent (Bizley et al., 2016). The improvement in performance observed for  
253 multisensory stimuli could arise through multiple mechanisms: it might be that by cueing  
254 cross-modal spatial attention to a particular region of space with the reference stimulus  
255 performance is enhanced (Spence and Driver, 1997); it may be that early cross-modal  
256 integration of auditory and visual signals within auditory cortex (Bizley and King, 2008)

257 enables the visual stimulus to improve the representation of the sound in auditory cortex;  
258 alternatively separate auditory and visual estimates of the relative location of the reference  
259 and target sound might allow weighted integration at a later decision-making stage (Alais and  
260 Burr, 2004). While relating localisation acuity and accuracy is non-trivial (Moore et al., 2008)  
261 an improved reference representation should facilitate improved performance: The results of  
262 Experiment 2, in which an AV reference stimulus did not enhance the ability of observers to  
263 discriminate the direction of a subsequent auditory target, is therefore most consistent with  
264 the third option: that the improvement in performance seen for multisensory stimuli results  
265 from the integration of separate auditory and visual decisions.

## 266 Acknowledgments

267

268 This work was supported by the Wellcome Trust and Royal Society through a Sir Henry Dale  
269 Fellowship to JKB (98418/Z/12/Z).

## 270 References

- 271 Alais D, Burr D (2004) The ventriloquist effect results from near-optimal bimodal  
272 integration. *Curr Biol* 14:257-262.
- 273 Bertelson P, Radeau M (1981) Cross-modal bias and perceptual fusion with auditory-visual  
274 spatial discordance. *Percept Psychophys* 29:578-584.
- 275 Bizley JK, King AJ (2008) Visual-auditory spatial processing in auditory cortical neurons.  
276 *Brain Res* 1242:24-36.
- 277 Bizley JK, Jones GP, Town SM (2016) Where are multisensory signals combined for  
278 perceptual decision-making? *Curr Opin Neurobiol* 40:31-37.
- 279 Brainard DH (1997) The Psychophysics Toolbox. *Spat Vis* 10:433-436.
- 280 Carlile S, Fox A, Orchard-Mills E, Leung J, Alais D (2016) Six Degrees of Auditory Spatial  
281 Separation. *J Assoc Res Otolaryngol* 17:209-221.

- 282 Charbonneau G, Veronneau M, Boudrias-Fournier C, Lepore F, Collignon O (2013) The  
 283 ventriloquist in periphery: impact of eccentricity-related reliability on audio-visual  
 284 localization. *J Vis* 13:20.
- 285 Green DM, Swets JA (1966) *Signal Detection Theory and Psychophysics*. New York: Wiley.
- 286 Howard IP, Templeton WB (1966) *Human Spatial Orientation*. New York: Wiley.
- 287 Makous JC, Middlebrooks JC (1990) Two-dimensional sound localization by human  
 288 listeners. *J Acoust Soc Am* 87:2188-2200.
- 289 Mateeff S, Gourevich A (1984) Brief stimuli localization in visual periphery. *Acta*  
 290 *physiologica et pharmacologica Bulgarica* 10:64-71.
- 291 Miller J (1982) Divided attention: evidence for coactivation with redundant signals.  
 292 *Cognitive psychology* 14:247-279.
- 293 Mills AW (1958) On the minimum audible angle. *J Acoust Soc Am* 30:237-246.
- 294 Moore JM, Tollin DJ, Yin TC (2008) Can measures of sound localization acuity be related to  
 295 the precision of absolute location estimates? *Hear Res* 238:94-109.
- 296 Perrott DR, Costantino B, Cisneros J (1993) Auditory and visual localization performance in  
 297 a sequential discrimination task. *J Acoust Soc Am* 93:2134-2138.
- 298 Spence C, Driver J (1997) Audiovisual links in exogenous covert spatial orienting. *Percept*  
 299 *Psychophys* 59:1-22.
- 300 Ulrich R, Miller J, Schroter H (2007) Testing the race model inequality: an algorithm and  
 301 computer programs. *Behavior research methods* 39:291-302.
- 302 Wood KC, Bizley JK (2015) Relative sound localisation abilities in human listeners. *Journal*  
 303 *of the Acoustical Society of America* 138:674.

304  
 305 Table 1

| Mean Location                      | -60                 | -45             | -30     | -15                  | 0                    | 15               | 30                  | 45 | 60                 |
|------------------------------------|---------------------|-----------------|---------|----------------------|----------------------|------------------|---------------------|----|--------------------|
| Performance different (p<0.05) at: | -30, -15, 0, 15, 30 | -30, -15, 0, 15 | -60,-45 | -60, -45, 30, 45, 60 | -60, -45, 30, 45, 60 | -60, -45, 15, 60 | -60, -15, 0, 15, 60 | 0  | -15, 0, 15, 30, 45 |

307 **Figure legends**

308 **Table 1**

309 Post-hoc pairwise comparisons (Bonferoni corrected) for the effect of spatial position in  
310 experiment 1.

311 **Figure 1 (color online)**

312 A Schematic of the testing chamber B, C Example threshold function for auditory (B) and  
313 visual (C) detection abilities. D, E, schematic of the trial structure for Experiment 1 (D, AV  
314 trial) and Experiment 2 (E, AV reference trial) showing for one example trial in which the  
315 relative location of the stimulus shifts leftwards from +7.5 degrees to -7.5 degrees.

316 **Figure 2 (color online)**

317 Mean ( $\pm$ SEM) (A)  $d'$  scores for A, V and AV trials as a function of the mean reference-target  
318 location, (B) reaction times, (C) bias, (D) sensitivity gain (% gain relative to best unisensory  
319 performance), E, reaction time gain (% relative to fastest unisensory). \* indicate values are  
320 significantly non-zero ( $p < 0.05$  corrected for 5 comparisons). F-J, as A-E, but for Experiment  
321 2.

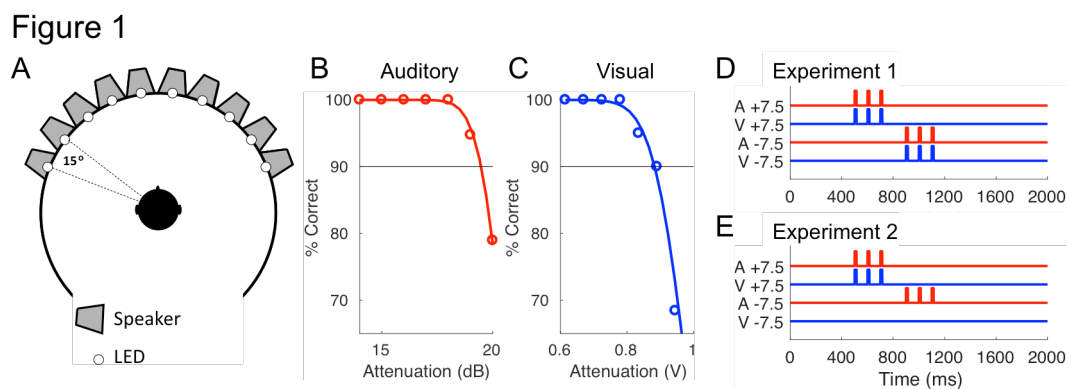

322

Figure 2

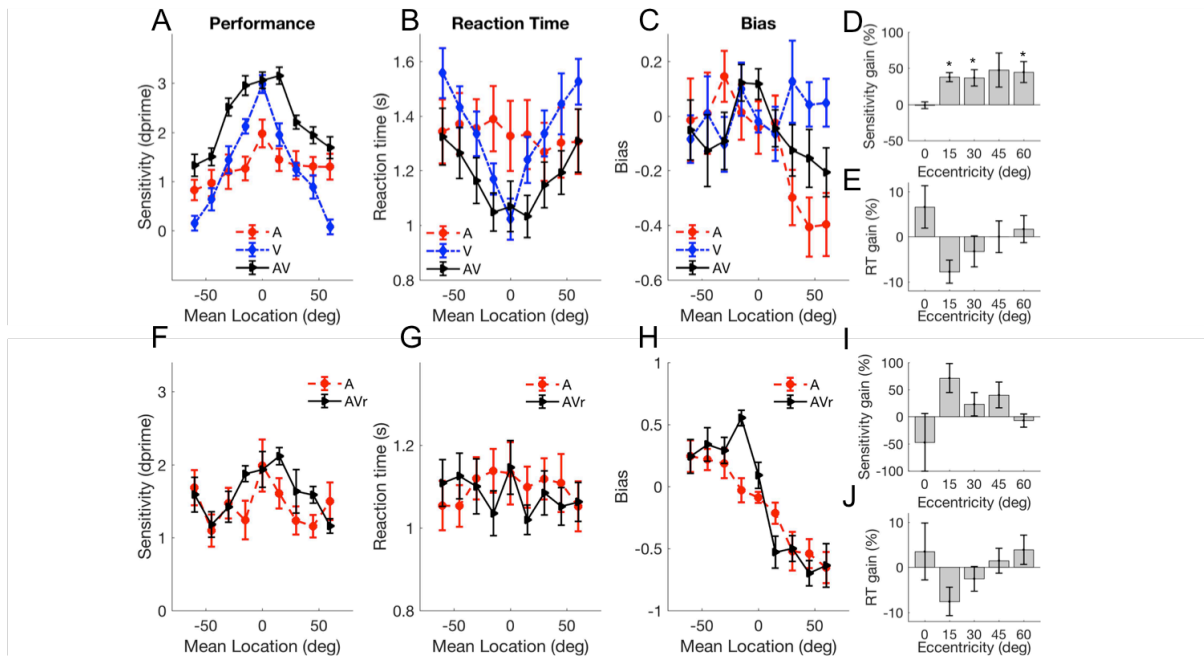

323

324
